# Supplementary material for: Enhanced reliability of phase-change memory via modulation of local structure and chemical bonding by incorporating carbon in Ge2Sb2Te5
Source: Royal Society of Chemistry journal article supplement (doi:10.1039/d1ra02210e), 2021-01-01
Supplement: d1ra02210e1.pdf [file d1ra02210e1.pdf]

# Supplementary Data

## Table S1

Table S1. Raman peaks in Figure 2, marked as A–E, for the as-grown film are compared with those for the re-amorphized film. The value of each peak area is listed in this table. The basic information for structural ratio summarized in Table 1 can be derived using these values.

|   | Amorphous<br>GST | Reamorphized<br>GST | Amorphous<br>CGST(5%) | Reamorphized<br>CGST(5%) | Amorphous<br>CGST(10%) | Reamorphized<br>CGST(10%) |
|---|------------------|---------------------|-----------------------|--------------------------|------------------------|---------------------------|
| A | 3167             | 3396                | 3327                  | 3992                     | 4095                   | 4170                      |
| B | 1343             | 903                 | 1105                  | 653                      | 1539                   | 968                       |
| C | 4131             | 3909                | 4584                  | 5478                     | 6051                   | 7740                      |
| D | 11666            | 15159               | 12861                 | 15640                    | 12946                  | 12049                     |
| E | 569              | 1022                | 529                   | 689                      | 1321                   | 1321                      |

## Table S2

Table S2. Fitting parameters and average coordination numbers from the Ge K-edge X-ray absorption spectra of GST and the 5% and 10% CGST films. The EXAFS data were analyzed with the FEFF8 code using an optimized structure, and the structural parameters were optimized using ARTEMIS.

|              | GST                | CGST(5%)           | CGST(10%)          |
|--------------|--------------------|--------------------|--------------------|
|              | Ge-Te              | Ge-Te              | Ge-Te              |
| R            | 2.83 Å             | 2.77 Å             | 2.81 Å             |
| N            | 2.40               | 3.34               | 3.17               |
| $\chi^2/\nu$ | $0.012 \pm 0.0039$ | $0.016 \pm 0.0016$ | $0.022 \pm 0.0059$ |

## Table S3

Table S3. Equation of the reset energy of GST and 5% and 10% CGST devices is derived as  $E_{\text{reset}} = (V_{\text{reset}}^2/R_{\text{set}}) \times t_{\text{reset}}$ . The reset energy of 5% CGST (~0.2 nJ) increases more than twice that of GST (~0.1 nJ). When the carbon content in CGST is doubled (i.e., 10%), the reset energy slightly increases to ~0.21 nJ compared with that in 5% CGST

| Reset Energy [nJ] |          |           |
|-------------------|----------|-----------|
| GST               | CGST(5%) | CGST(10%) |
| 0.098             | 0.204    | 0.216     |
